# Supplementary material
Source: MDPI journal article supplement (https://www.mdpi.com/1424-2818/12/12/474)
Supplement: s1 [file s1]

## Supplementary material

### Diversity and distribution of the dominant ant genus

#### *Anonychomyrma* (Hymenoptera: Formicidae) in the Australian Wet Tropics

Lily Leahy\*, Brett R. Scheffers, Stephen E. Williams, and Alan N. Andersen

\* Centre for Tropical Environmental and Sustainability Science, College of Science and Engineering, James Cook University, Townsville, QLD, 4811, Australia, Correspondence: [lily.leahy@my.jcu.edu.au](mailto:lily.leahy@my.jcu.edu.au)

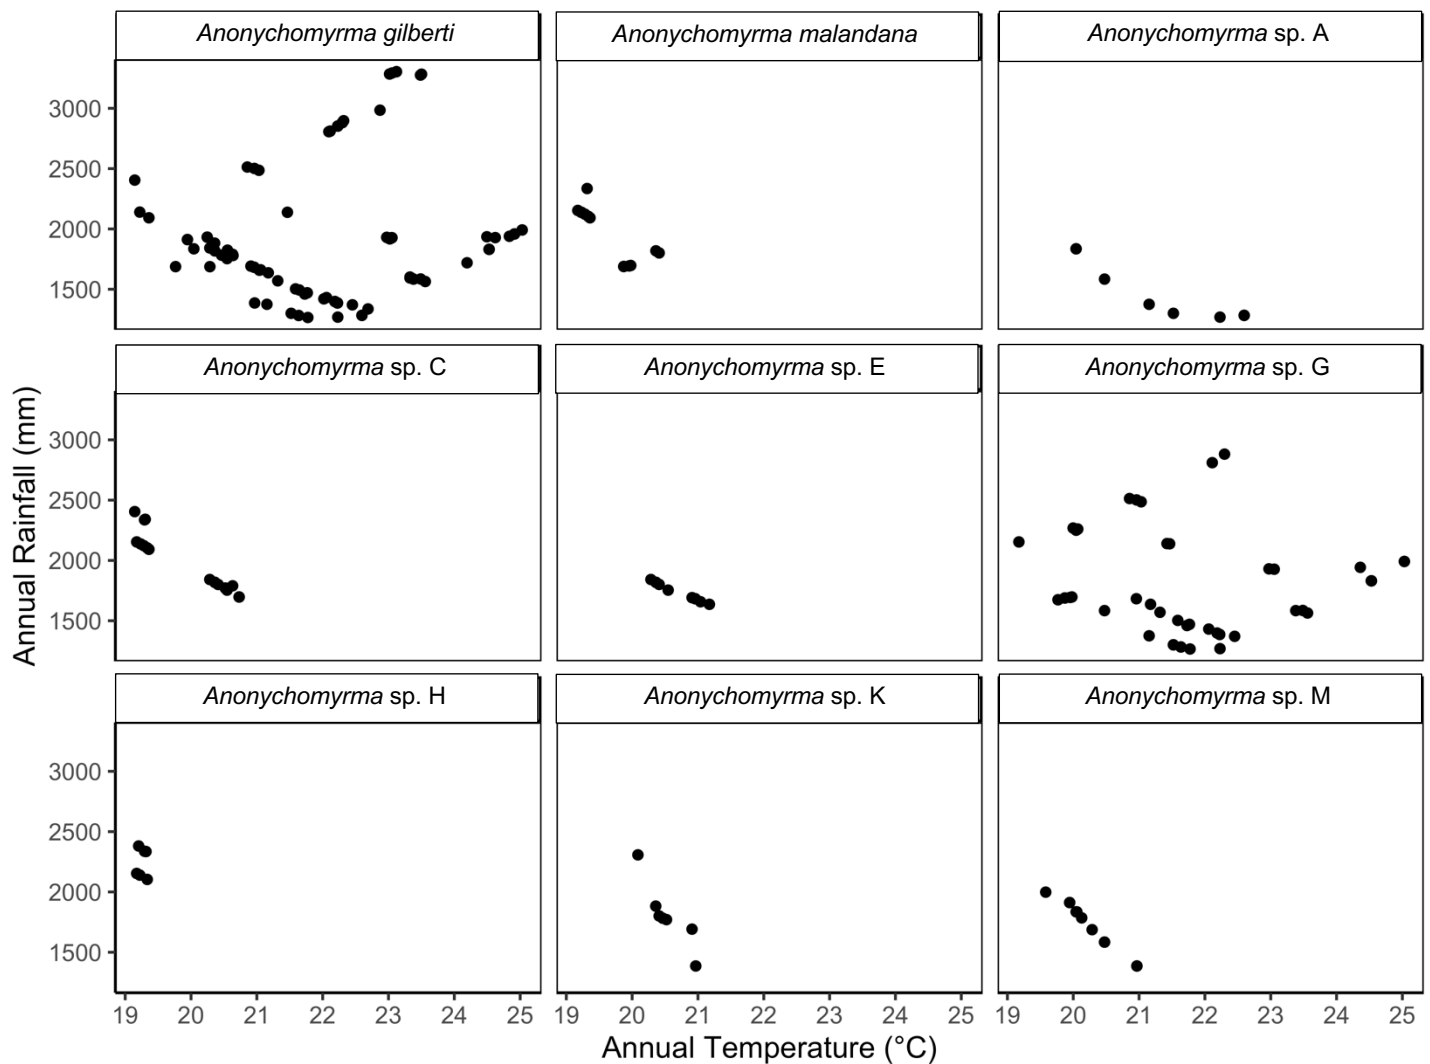

Figure S1. Environmental space occupied by nine species used in species distribution modelling based on our sampling across the AWT, annual rainfall and temperature from AccuClim layers [1].

Species responses to  
accuCLIM 1996-2015 05: Maximum temperature of the warmest month

*Anonychomyrma gilberti*

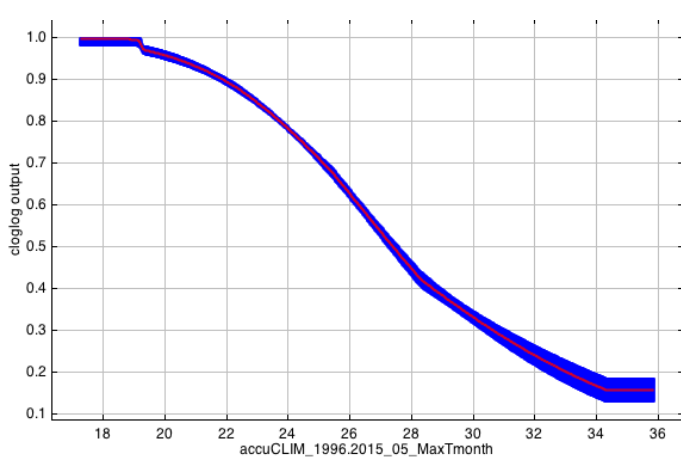

*Anonychomyrma* sp. G

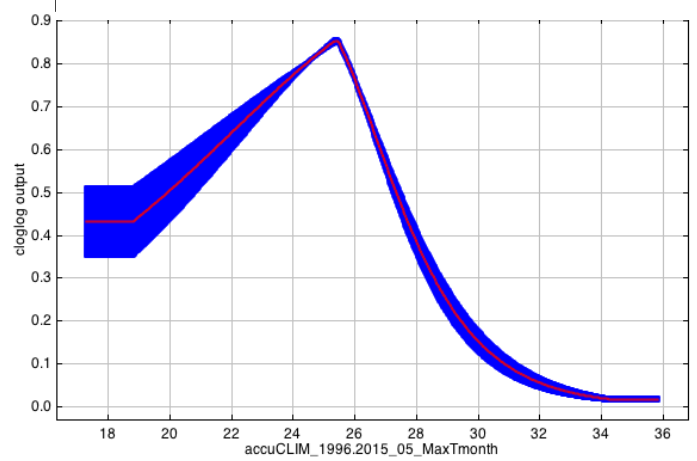

*Anonychomyrma malandana*

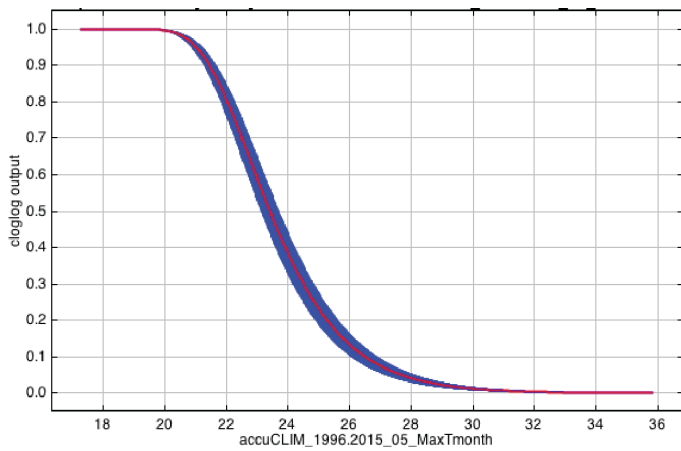

*Anonychomyrma* sp. C

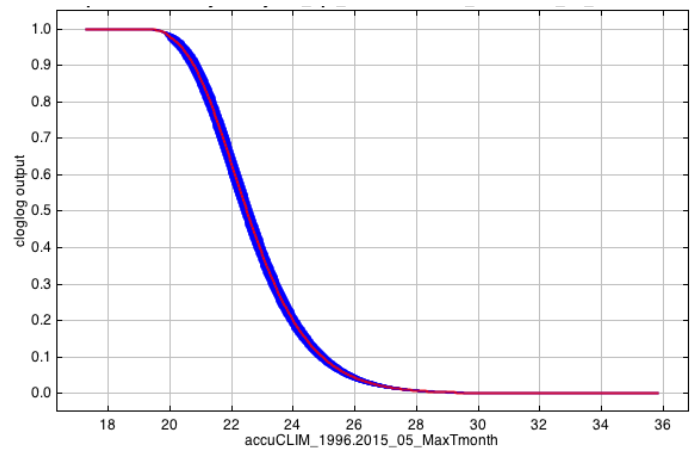

*Anonychomyrma* sp. M

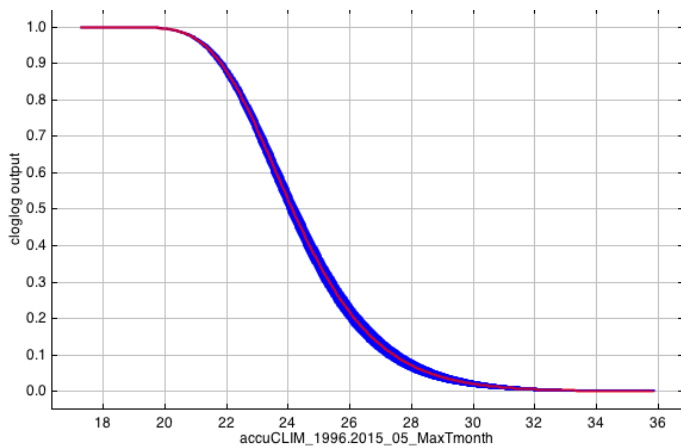

*Anonychomyrma* sp. E

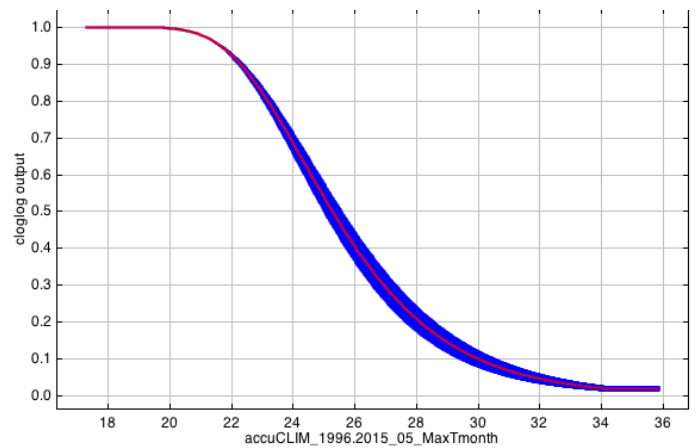

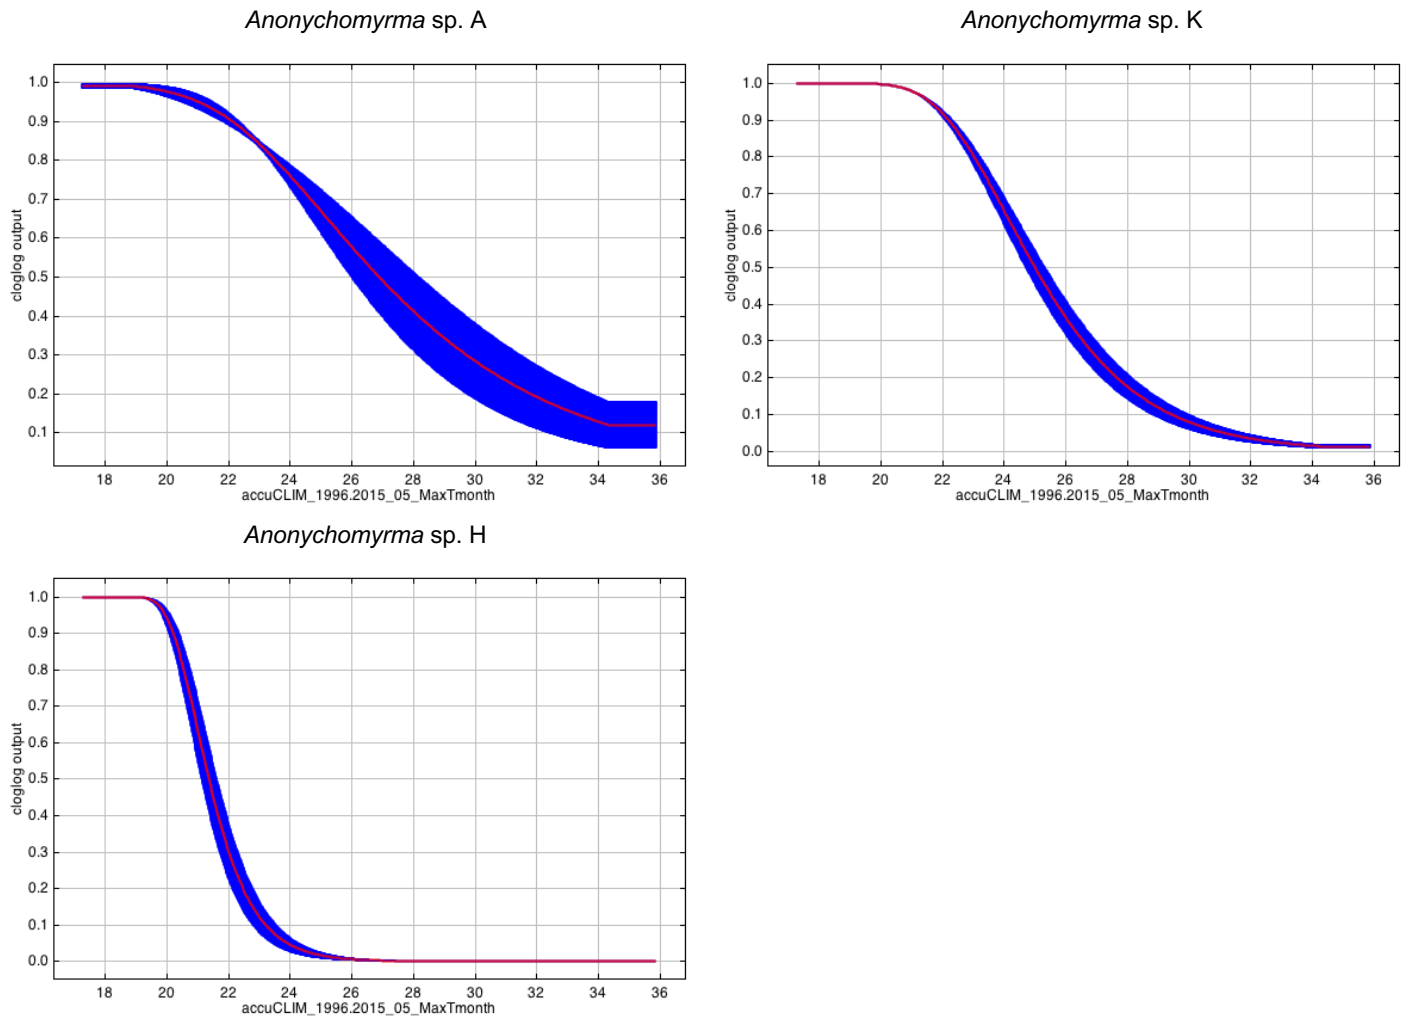

Figure S2: Species distribution modelling response curves showing *Anonychomyrma* species responses to accuCLIM 1996-2015 Variable 05: Maximum temperature of the warmest month. Included is those species that this variable ranked in the top three variables in regard to permutation importance. Response is the cloglog output from Maxent [2] which gives an estimate between 0-1 of probability of presence for that species. Plots show modeled probability of presence based off a model using only Maximum temperature of the warmest month.

Species responses to  
accuCLIM 1996-2015 13: Rainfall of the wettest month

*Anonychomyrma gilberti*

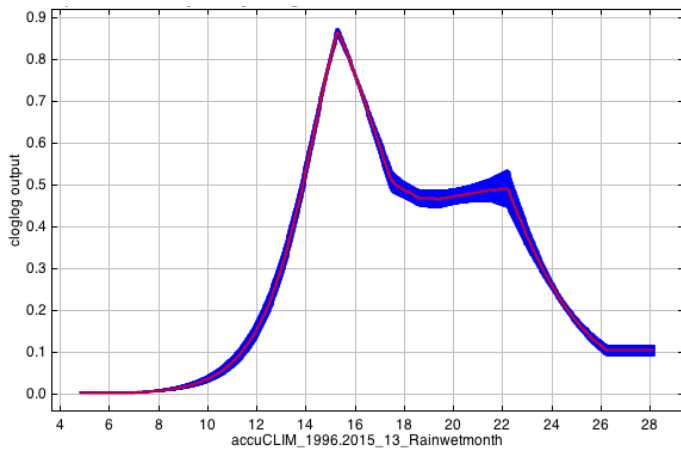

*Anonychomyrma* sp. G

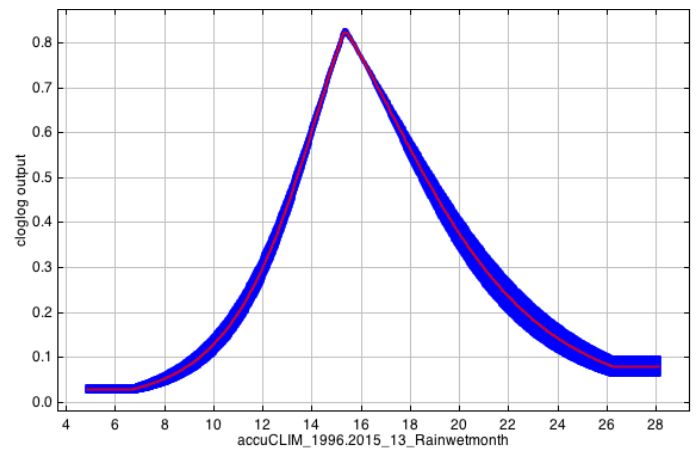

*Anonychomyrma* sp. C

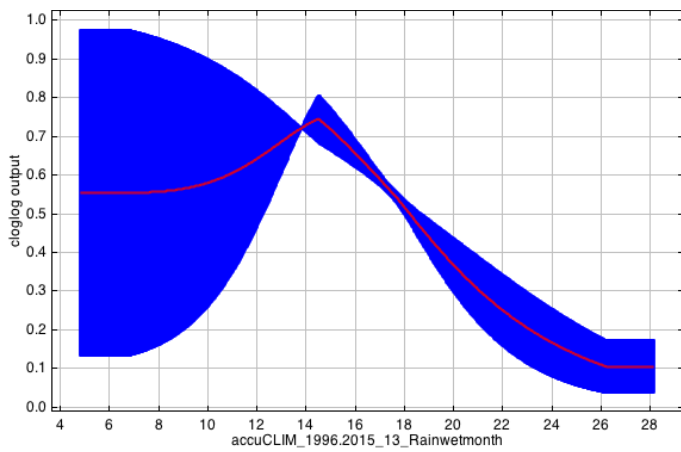

*Anonychomyrma malandana*

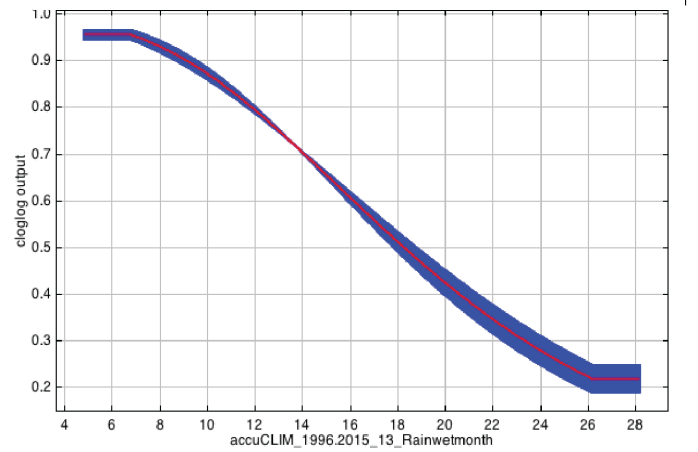

*Anonychomyrma* sp. M

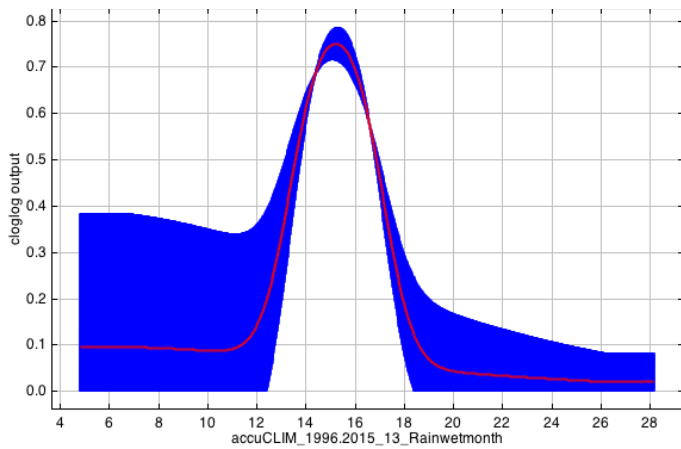

*Anonychomyrma* sp. E

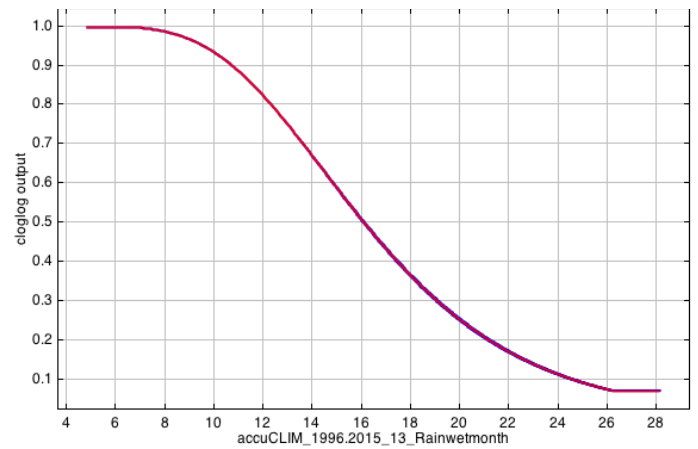

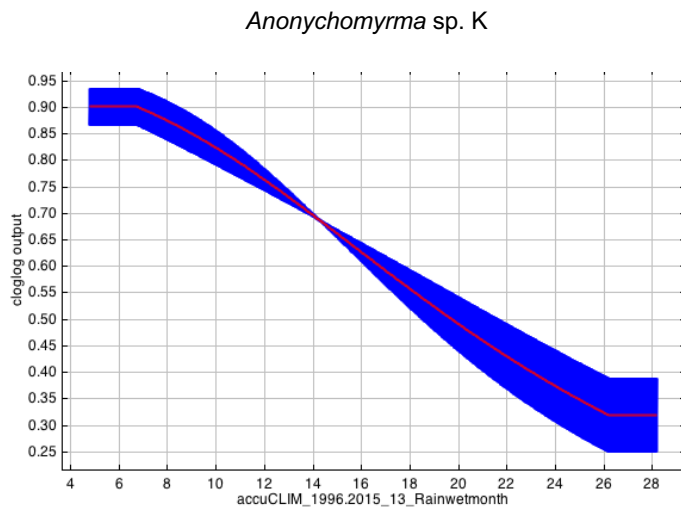

Figure S3: Species distribution modelling response curves showing *Anonychomyrma* species responses to accuCLIM 1996-2015 Variable 13: Rainfall of the wettest month. Included is those species that this variable ranked in the top three variables in regard to permutation importance. Response is the cloglog output from Maxent [2] which gives an estimate between 0-1 of probability of presence for that species. Plots show modeled probability of presence based off a model using only Rainfall of the wettest month.

# Species responses to accuCLIM 1996-2015 15: Rainfall seasonality

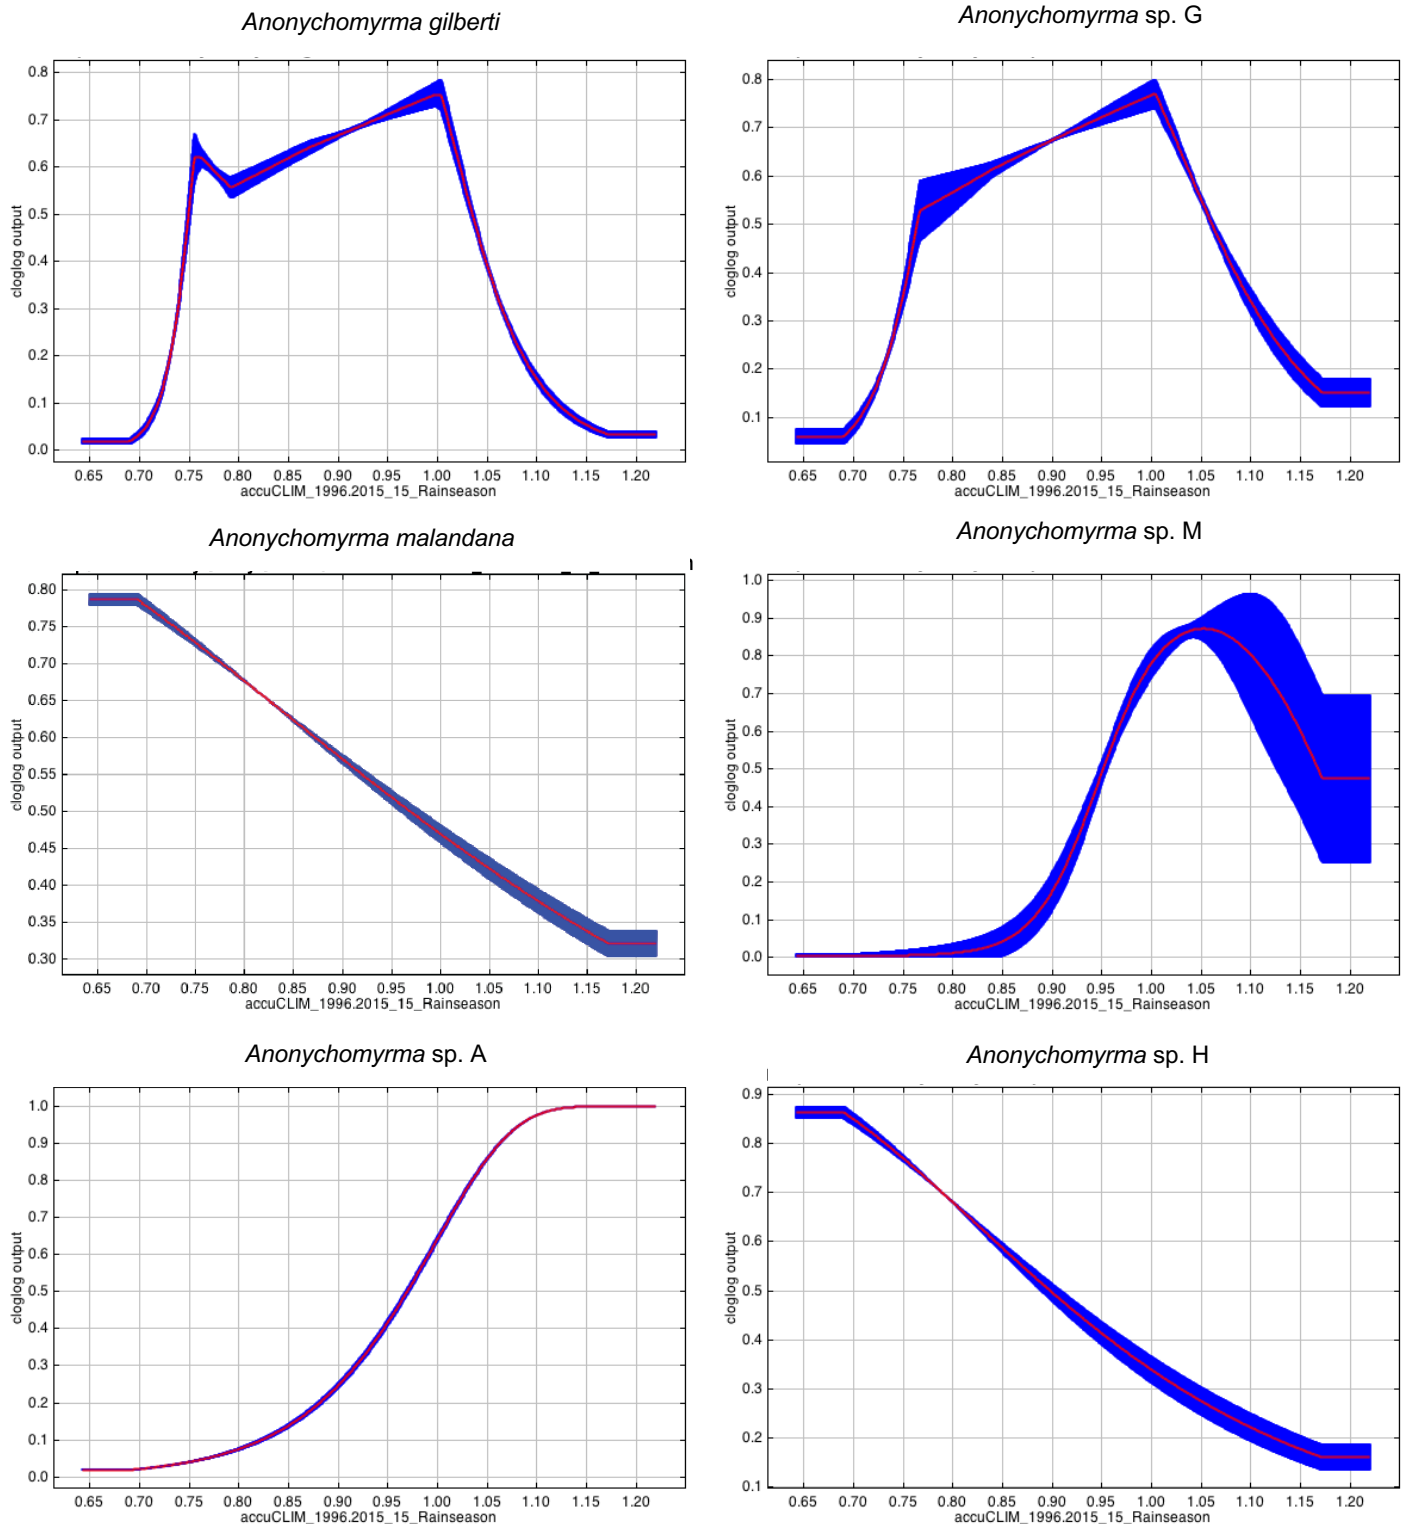

Figure S4: Species distribution modelling response curves showing *Anonychomyrma* species responses to accuCLIM 1996-2015 Variable 15: Rainfall seasonality. Included is those species that this variable ranked in the top three variables in regard to permutation importance. Response is the cloglog output from MaxEnt [2] which gives an estimate between 0-1 of probability of presence for that species. Plots show modeled probability of presence based off a model using only Rainfall seasonality.

## References

1. Storlie, C.; Phillips, B.; VanDerWal, J.; Williams, S. Improved spatial estimates of climate predict patchier species distributions. *Diversity and Distributions* **2013**, *19*, 1106-1113.
2. Phillips, S.J.; Anderson, R.P.; Schapire, R.E. Maximum entropy modeling of species geographic distributions. *Ecol. Model.* **2006**, *190*, 231-259.
